# Supplementary material for: Maternal Lineages during the Roman Empire, in the Ancient City of Gadir (Cádiz, Spain): The Search for a Phoenician Identity
Source: MDPI journal article supplement (doi:10.3390/genealogy7020027), 2023-04-17
Supplement: s1 [file s1]

**S.M.Table S1A – Morphological description of the individuals that were subjected to the genetic analysis.** According to their external conditions, the human remains of these individuals were considered suitable for the analysis of their biogeographical ancestry, mainly their teeth. In the table there is also information that concerns their probable historic period, where the human remains were found, the anthropological sex determination and the number of available samples considered for the present genetic analysis. In the case of individuals 8i and 8ii, they were both found in the same grave, and to distinguish them the genetic investigators called them 8i and 8ii. *B.C*, before Christ; *A.D.*, *Anno Domini*

| Individual | Dating              | Localization                                                                   | Anthropological sex determination | Morphological Description                                                                                                                                                  | Number of available samples |
|------------|---------------------|--------------------------------------------------------------------------------|-----------------------------------|----------------------------------------------------------------------------------------------------------------------------------------------------------------------------|-----------------------------|
| 1G         | V-IV millennium B.C | Burial of Campo de Hockey (San Fernando, Cádiz, Spain)                         | No data available                 | No morphological description available.                                                                                                                                    | 2                           |
| 2G         | II millennium B.C.  | Burial of Plaza de Asarúbal (Cádiz, Spain)                                     | No data available                 | No morphological description available.                                                                                                                                    | 2                           |
| 3G         | V-IV B.C.           | Burial of Cuarteles de Varela. (Cádiz, Spain)                                  | Male                              | Adult; teeth without cavities, and the enamel seems to be well maintained.                                                                                                 | 3                           |
| 4G         | IV B.C.             | Burial of Cuarteles de Varela. (Cádiz, Spain)                                  | Male                              | Adult. Possible periodontal diseases since the majority of the teeth were not in the alveoli. The enamel seems to be well maintained                                       | 3                           |
| 5G         | III-II B.C          | Burial of Cuarteles de Varela. (Cádiz, Spain)                                  | Male                              | Young adult. Dentition in an acceptable condition.                                                                                                                         | 2                           |
| 6G         | III B.C             | Burial of Cuarteles de Varela. (Cádiz, Spain)                                  | Male                              | Ancient adult. Dentition degraded with some teeth loss.                                                                                                                    | 2                           |
| 7G         | I B.C               | Burial of Cuarteles de Varela. (Cádiz, Spain)                                  | Female                            | Young adult. According to its cranial and teeth morphology, there is a possibility that she was from Africa.                                                               | 2                           |
| 8iG        | I-III A.D           | (Cádiz, Spain)                                                                 | No data available                 | No morphological description available.                                                                                                                                    | 3                           |
| 8iiG       | I-III A.D           | (Cádiz, Spain)                                                                 | No data available                 | No morphological description available.                                                                                                                                    | 3                           |
| 9G         | IV-V A.D.           | Burial of Teatro Cómico. (Cádiz, Spain)                                        | No data available                 | Young adult. Several vertebral congenital malformations. Dentition in an acceptable condition.                                                                             | 2                           |
| 10G        | IV-V A.D.           | Burial of Teatro Cómico. (Cádiz, Spain)                                        | Male                              | Ancient adult. The skeleton exhibits signs of arthrosis widespread.                                                                                                        | 3                           |
| 11G        | IV-V A.D.           | Burial of Teatro Cómico. (Cádiz, Spain)                                        | Male                              | Adult. Presents a mutilation in the left forearm. According to its cranial morphology, there is a chance of an African origin. His dentition was in a very good condition. | 3                           |
| 12G        | IV-V A.D.           | Burial of Teatro Cómico. (Cádiz, Spain)                                        | Indeterminate                     | Infant. Deciduous teeth in good condition.                                                                                                                                 | 2                           |
| 13G        | XII A.D.            | (Cádiz, Spain)                                                                 | No data available                 | No morphological description available.                                                                                                                                    | 4                           |
| 14G        | XVI-XVIII A.D.      | Burial of the Hospital de la Misericordia de San Juan de Dios. (Cádiz, Spain). | No data available                 | No morphological description available.                                                                                                                                    | 2                           |

|     |           |                                            |      |                                                                          |   |
|-----|-----------|--------------------------------------------|------|--------------------------------------------------------------------------|---|
| 15G | IV-V A.D. | Burial of Teatro Cómico.<br>(Cádiz, Spain) | Male | Adult. The skeletal remains seem to indicate an adult with tall stature. | 3 |
|-----|-----------|--------------------------------------------|------|--------------------------------------------------------------------------|---|

**S.M.Table S1B – Photos of the analysed samples.**  represents 1cm.

| Individual | Number of available samples | Photos of the analysed samples. Source: C. Gomes                                        |                                                                                           |                                                                                           |
|------------|-----------------------------|-----------------------------------------------------------------------------------------|-------------------------------------------------------------------------------------------|-------------------------------------------------------------------------------------------|
| 1G         | 2                           |  1G1   |  1G2   |                                                                                           |
| 2G         | 2                           |  2G1   |  2G2   |                                                                                           |
| 3G         | 3                           |  3G1  |  3G2  |  3G3  |
| 4G         | 3                           |  4G1 |  4G2 |  4G3 |

|      |   |                                                                                                                                                                                                                                                                                   |
|------|---|-----------------------------------------------------------------------------------------------------------------------------------------------------------------------------------------------------------------------------------------------------------------------------------|
| 5G   | 2 |  5G1  5G2                                                                                                     |
| 6G   | 2 |  6G1  6G2                                                                                                     |
| 7G   | 2 |  7G1  7G2                                                                                                     |
| 8iG  | 3 |  8iG1  8iG2  8iG3       |
| 8iiG | 3 |  8iiG1  8iiG2  8iiG3 |

|     |   |                                                                                             |                                                                                              |                                                                                             |
|-----|---|---------------------------------------------------------------------------------------------|----------------------------------------------------------------------------------------------|---------------------------------------------------------------------------------------------|
| 9G  | 2 | <br>9G1    | <br>9G2   |                                                                                             |
| 10G | 3 | <br>10G1   | <br>10G2  | <br>10G3 |
| 11G | 3 | <br>11G1   | <br>11G2  | <br>11G3 |
| 12G | 2 | <br>12G1 | <br>12G2 |                                                                                             |
|     |   |                                                                                             |                                                                                              |                                                                                             |



|     |   |                                                                                            |                                                                                              |                                                                                              |                                                                                             |
|-----|---|--------------------------------------------------------------------------------------------|----------------------------------------------------------------------------------------------|----------------------------------------------------------------------------------------------|---------------------------------------------------------------------------------------------|
| 13G | 4 | <br>13G1  | <br>13G2   | <br>13G3  | <br>13G4 |
| 14G | 2 | <br>14G1  | <br>14G2  |                                                                                              |                                                                                             |
| 15G | 3 | <br>15G1 | <br>15G2 | <br>15G3 |                                                                                             |

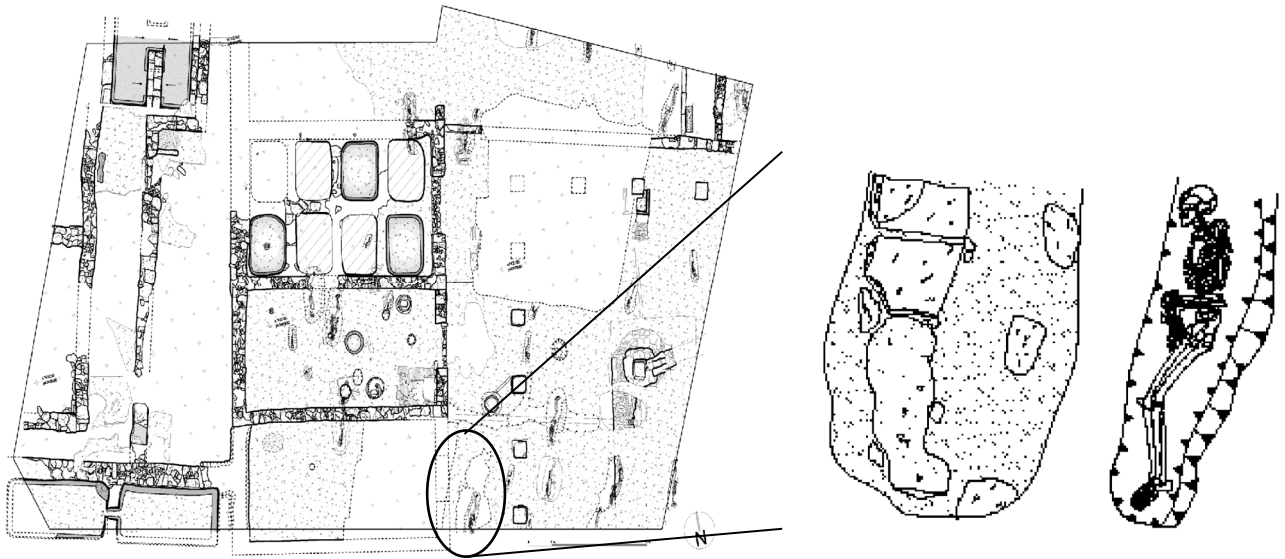

Plan of the salting factory from Roman times, in the NW sector of the excavation there was the Phoenician wall.

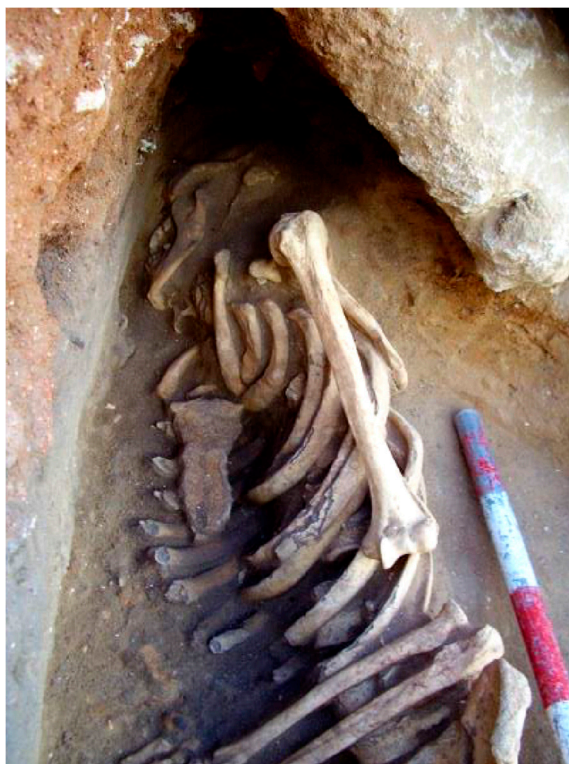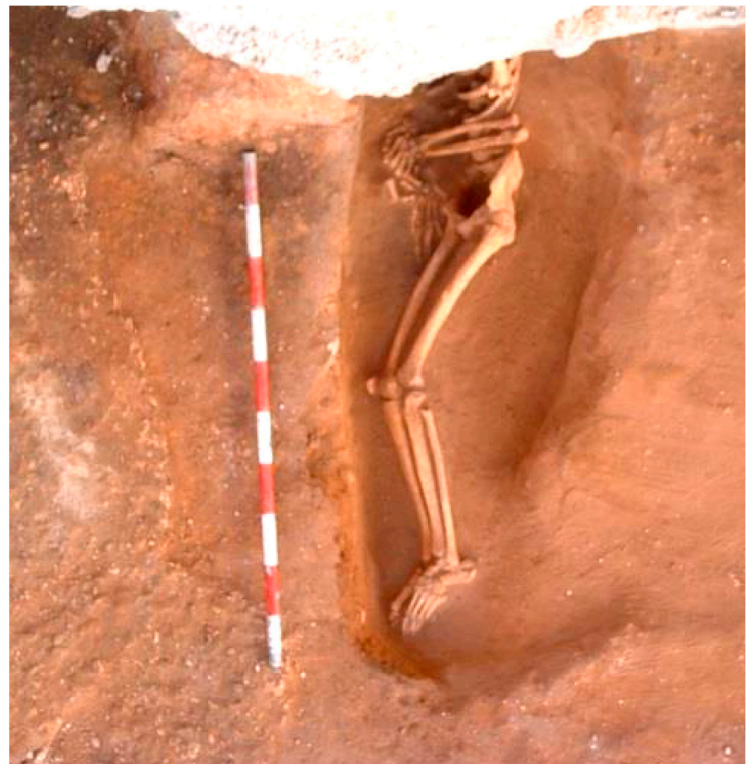

**S.M. Figure S1.** Planimetry and photographs of individual 10 found in the “Solar del Antiguo Teatro Cómico”. Source: JM Pajuelo and JMGener Basallote.



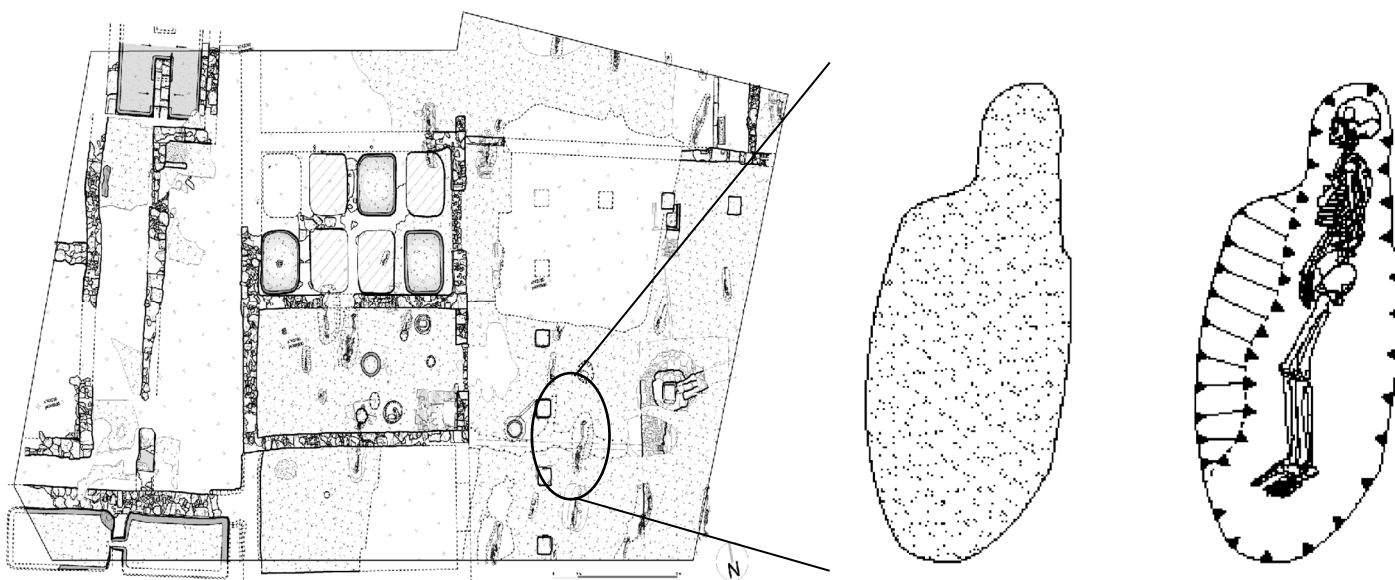

Plan of the salting factory from Roman times, in the NW sector of the excavation there was the Phoenician wall.

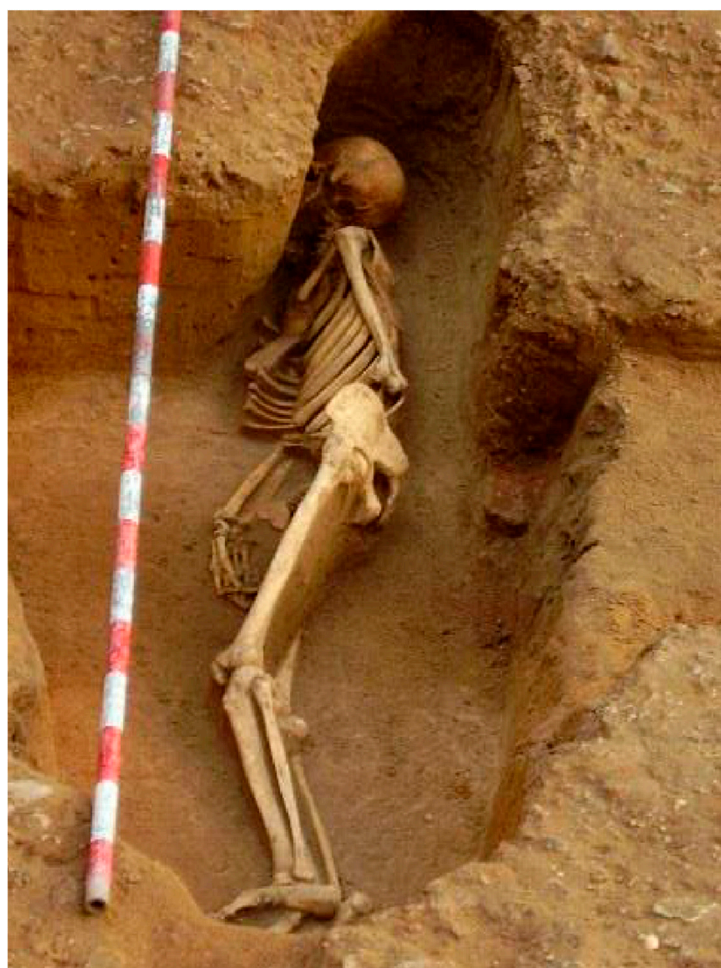

**S.M. Figure S2.** Planimetry and a photograph of individual 11 found in the “Solar del Antiguo Teatro Cómico”. Source: JM Pajuelo and JMGener Basallote.

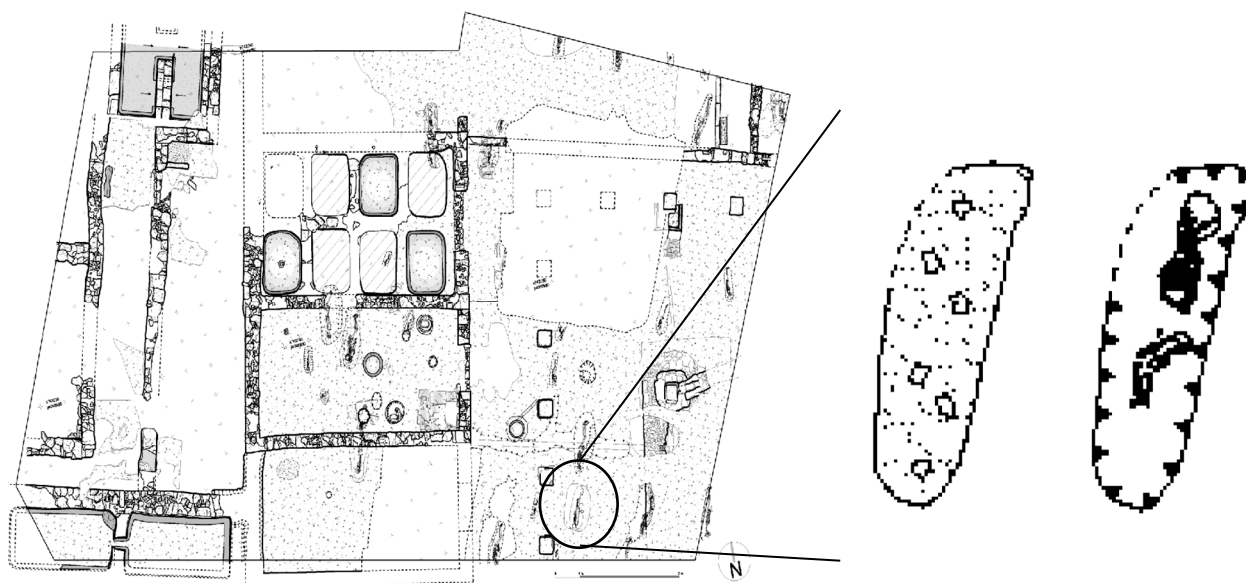

Plan of the salting factory from Roman times, in the NW sector of the excavation there was the Phoenician wall.

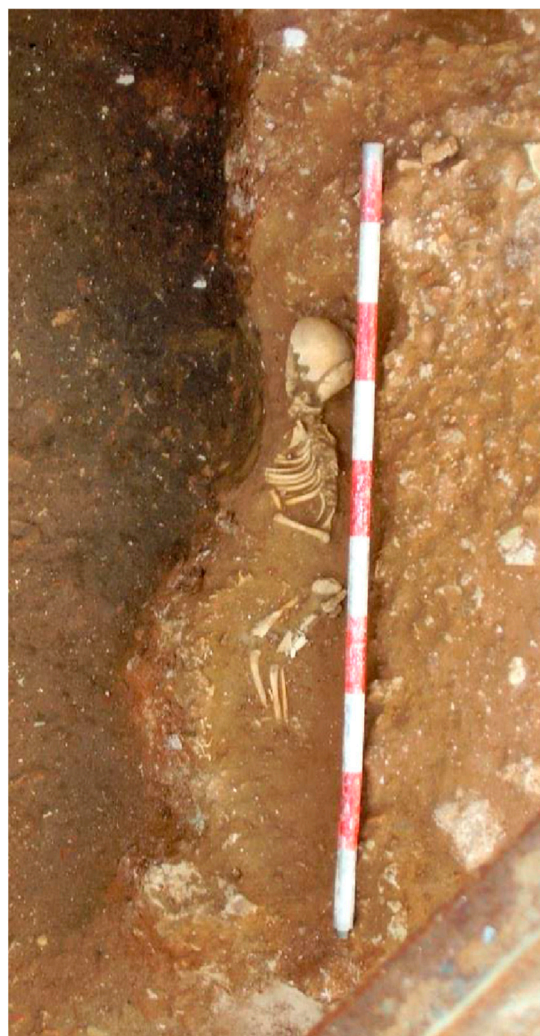

**S.M. Figure S3.** Planimetry and a photograph of individual 12 found in the “Solar del Antiguo Teatro Cómico”. Source: JM Pajuelo and JMGener Basallote.



**S.M.Table S2.** Primers used for the HV1 and HV2 mtDNA regions amplification

| mtDNA region | Primer                                               | Primer sequence               | Primer position | Amplified fragment   |
|--------------|------------------------------------------------------|-------------------------------|-----------------|----------------------|
| HV1          | L16125<br>( <i>Fernandez et al</i> , 2005)<br>(44)   | 5'-GCCAGCCACCATGAATATTG-3'    | 16106-16125     | 16106-16276<br>170pb |
|              | H16259<br>( <i>Fernandez et al</i> , 2005)<br>(44)   | 5'-ATCCTAGTGGGTGAGGGG-3'      | 16276-16259     |                      |
|              | L16251<br>( <i>Fernandez et al</i> , 2005)<br>(44)   | 5'-CACACATCAACTGCAACTCC-3'    | 16232-16251     | 16232-16399<br>167pb |
|              | H16380<br>( <i>Fernandez et al</i> , 2005)<br>(44)   | 5'-TCAAGGGACCCCTATCTGAG-3'    | 16399-16380     |                      |
| HV2          | L29<br>( <i>Martínez-Labarga et al</i> , 1999) (45)  | 5'-GGTCTATCACCCATTATAACCAC-3' | 29-129          | 10-129<br>119bp      |
|              | H108<br>( <i>Martínez-Labarga et al</i> , 1999) (45) | 5' GATACTGCGACATAGGGTGCT 3'   | 10-108          |                      |
|              | L100<br>( <i>Martínez-Labarga et al</i> , 1999) (45) | 5'-ATAGCATTGCGAGACGCTG-3'     | 82-100          | 153-408<br>255pb     |
|              | H389<br>( <i>Martínez-Labarga et al</i> , 1999) (45) | 5'-CTGGTTAGGCTGGTGTTAGG-3'    | 408-389         |                      |

**S.M.Table S3.** Haplogroup-specific SNPs set with their respective sequence.

| SNP                                                                                        | Forward Sequence              | Reverse Sequence          | Haplogroup Specific                                |
|--------------------------------------------------------------------------------------------|-------------------------------|---------------------------|----------------------------------------------------|
| <b>C10873T</b><br>Gamba <i>et al.</i><br>2012 (23)                                         | AATTTGAATCAACACAACCA          | GGGGAACAGCTAAATAGGTT      | 10873C – L3 (19, 22)<br>10873T – N (19, 22)        |
| <b>C7028T</b><br>Gamba <i>et al.</i><br>2012<br>(23)                                       | CAAATCATCACTAGACATCG          | GAATGAAGCCTCCTATGATGG     | 7028C – H (19, 22)<br>7028T - HV0 (19, 22)         |
| <b>C14766T</b><br>Gamba <i>et al.</i><br>2012<br>(23)                                      | AAAACCATCGTTGTATTTCAA         | GGAGGTCGATGAATGAGTG       | 14766C – HV0 (19, 22)<br>14766T – R (19, 22)       |
| <b>G10398A</b><br>van Oven <i>et al.</i> , 2011<br>(46)                                    | TCATCCCTCTTATTAATCATCATC<br>C | TGTAAATGAGGGGCATTGG       | 10398A – N; R (19, 22)<br>10398G - L (19, 22)      |
| <b>A769G</b><br>van Oven <i>et al.</i> , 2011<br>(46)                                      | ACATCACCCCATAAACAATAGG        | AGCGTTTTGAGCTGCATTG       | 769A - L1; L2 (19, 22)<br>769G – L3; N; R (19, 22) |
| <b>A12705C</b><br>Designed for<br>this<br>investigation<br>, using<br>Pimer3<br>Plus©      | ACTCAGACCCAAACATTAATCAG<br>T  | CCCTCTCAGCCGATGAACAG      | 12705C - R (19, 22)<br>12705T - N (19, 22)         |
| <b>T6392C</b><br>Designed for<br>this<br>investigation<br>, using<br>Pimer3<br>Plus© (47)  | TCTCCTCTATCTTAGGGGCCA         | GACGGATCAGACGAAGAGGG      | 6392T – R (19, 22)<br>6392C – F (19, 22)           |
| <b>G10320A</b><br>Designed for<br>this<br>investigation<br>, using<br>Pimer3<br>Plus© (47) | GCCCTCCTTTTACCCCTACC          | GCCAGACTTAGGGCTAGGAT<br>G | 10320G – F (19, 22)<br>10320A – F3 (19, 22)        |

**S.M. Table S4.** Multinomial obtained results for the three considered metapopulations (African, Europe and Eastern populations) and the thirteen specific populations. The presented frequencies were obtained by consulting Emery et al., (2015).

|                            |                 | Haplogroups (frecuencies) ( Emery et al., (2015)) |        |        |                   | Probability           |
|----------------------------|-----------------|---------------------------------------------------|--------|--------|-------------------|-----------------------|
|                            |                 | H                                                 | HV0    | L3     | Other Haplogroups |                       |
| <b>Metapopulations</b>     | <b>African</b>  | 0.0709                                            | 0.0551 | 0.1811 | 0.6929            | $7.8 \times 10^{-8}$  |
|                            | <b>European</b> | 0.3700                                            | 0.0200 | 0.0001 | 0.6099            | $7.4 \times 10^{-12}$ |
|                            | <b>Eastern</b>  | 0.2143                                            | 0.0804 | 0.0357 | 0.6696            | $9.2 \times 10^{-7}$  |
| <b>Specific population</b> | French          | 0.4643                                            | 0.0001 | 0.0001 | 0.5357            | $3.6 \times 10^{-23}$ |
|                            | Sardinian       | 0.2857                                            | 0.0001 | 0.0001 | 0.7141            | $1.4 \times 10^{-23}$ |
|                            | North Italian   | 0.2500                                            | 0.0001 | 0.0001 | 0.7498            | $1.1 \times 10^{-23}$ |
|                            | Tuscan          | 0.3750                                            | 0.2500 | 0.0001 | 0.3749            | $2.3 \times 10^{-6}$  |
|                            | French Basque   | 0.4167                                            | 0.2500 | 0.0001 | 0.3332            | $2.8 \times 10^{-6}$  |
|                            | Bedouin         | 0.0889                                            | 0.0444 | 0.0444 | 0.8222            | $1.1 \times 10^{-8}$  |
|                            | Mandenka        | 0.0001                                            | 0.0001 | 0.4286 | 0.5712            | $7.2 \times 10^{-27}$ |
|                            | Yoruba          | 0.0001                                            | 0.0001 | 0.2857 | 0.7141            | $4.8 \times 10^{-27}$ |
|                            | Bantu           | 0.0001                                            | 0.0556 | 0.3333 | 0.6110            | $2.9 \times 10^{-13}$ |
|                            | Mozabite        | 0.1724                                            | 0.1379 | 0.1034 | 0.5862            | $2.6 \times 10^{-5}$  |
|                            | Druze           | 0.4390                                            | 0.0244 | 0.0001 | 0.7857            | $2.8 \times 10^{-11}$ |



|  |             |        |        |        |        |                      |
|--|-------------|--------|--------|--------|--------|----------------------|
|  | Palestinian | 0.1042 | 0.0833 | 0.0833 | 0.7292 | $6.1 \times 10^{-7}$ |
|  | Yakut       | 0.0400 | 0.1600 | 0.0001 | 0.7999 | $2.8 \times 10^{-9}$ |
